# Supplementary material for: Bacteriophage origin of some minimal ATP-dependent DNA ligases: a new structure from Burkholderia pseudomallei with striking similarity to Chlorella virus ligase
Source: PubMed Central journal article supplement (PMC8455567; doi:10.1038/s41598-021-98155-w), 2021-09-21
Supplement: 41598_2021_98155_MOESM1_ESM.pdf [file 41598_2021_98155_MOESM1_ESM.pdf]

## **Supplementary material:** Bacteriophage origin of some minimal ATP-dependent DNA ligases: a new structure from *Burkholderia pseudomallei* with striking similarity to Chlorella virus ligase

Jolyn Pan<sup>1</sup>, Kjersti Lian<sup>2</sup>, Aili Sarre<sup>2</sup>, Hanna-Kirsti S. Leiros<sup>2</sup> and Adele Williamson<sup>1,2\*</sup>

<sup>1</sup> School of Science, University of Waikato, Hamilton 3240, New Zealand

<sup>2</sup> Department of Chemistry, UiT The Arctic University of Norway, Tromsø, N-9037, Norway

\* To whom correspondence should be addressed. Email: adelew@waikato.ac.nz

| <b>Bacterium</b>                                                  | <b>ATP-dependent DNA ligase Uniprot identifier</b> |
|-------------------------------------------------------------------|----------------------------------------------------|
| <i>Actinobacillus indolicus</i> .                                 | A0A4P7CEM4                                         |
| <i>Actinobacillus ureae</i> ATCC 25976.                           | E8KK51                                             |
| <i>Alteromonas lipolytica</i> .                                   | A0A1E8FI42                                         |
| <i>Alteromonas macleodii</i> (strain Balearic Sea AD45).          | K0EC25                                             |
| <i>Alteromonas mediterranea</i> .                                 | S5BYS1                                             |
| <i>Arcobacter anaerophilus</i> .                                  | A0A4Q0Y3K8                                         |
| <i>Campylobacter coli</i> .                                       | A0A3I7XBS7                                         |
| <i>Campylobacter concisus</i> ATCC 51562.                         | U2F5T9                                             |
| <i>Campylobacter concisus</i> .                                   | A0A1X4MGH7                                         |
| <i>Campylobacter curvus</i> (strain 525.92).                      | A7GWV3                                             |
| <i>Campylobacter gracilis</i> RM3268.                             | C8PLL2                                             |
| <i>Campylobacter iguaniorum</i> .                                 | A0A076FAH4                                         |
| <i>Campylobacter jejuni subsp. Doylei</i> (strain ATCC BAA-1458). | A7H619                                             |
| <i>Campylobacter jejuni subsp. Jejuni</i> serotype O:23           | A0A0H3PA79                                         |
| <i>Campylobacter lari</i> (strain RM2100).                        | B9KEB9                                             |
| <i>Campylobacter lari</i> NCTC 11845.                             | A0A0A8HT75                                         |
| <i>Campylobacter lari</i> RM16712.                                | A0A0A8I9J1                                         |
| <i>Campylobacter novaezeelandiae</i> .                            | A0A4Q9JVC0                                         |
| <i>Campylobacter peloridis</i> LMG 23910.                         | A0A0A8GTI2                                         |
| <i>Campylobacter pinnipediorum subsp. Pinnipediorum</i> .         | A0A1S6TMG5                                         |
| <i>Campylobacter rectus</i> RM3267.                               | B9D382                                             |
| <i>Campylobacter showae</i> RM3277.                               | C6RIM0                                             |
| <i>Campylobacter sp.</i> 113.                                     | A0A2A4L8C3                                         |
| <i>Campylobacter sp.</i> P255.                                    | A0A420VLA9                                         |
| <i>Campylobacter sp.</i> RM16704.                                 | A0A0A8GVK8                                         |
| <i>Campylobacter sp.</i> US12a.                                   | A0A5R1LGW9                                         |
| <i>Campylobacter sp.</i> US25a.                                   | A0A5E9WQ41                                         |
| <i>Campylobacter sp.</i> US33a.                                   | A0A4Y8BSD2                                         |
| <i>Campylobacter subantarcticus</i> .                             | A0A0A8HAL8                                         |
| <i>Candidatus Magnetomorum sp.</i> HK-1.                          | A0A0M9ECM2                                         |
| <i>Colwellia psychrerythraea</i> .                                | A0A099KNG4                                         |

---

|                                                                                |            |
|--------------------------------------------------------------------------------|------------|
| <i>Eikenella corrodens</i> CC92I.                                              | V7IE47     |
| <i>Ferrimonas sediminum</i> .                                                  | A0A1G8TBD7 |
| <i>Haemophilus haemolyticus</i> M19501.                                        | F9GMF5     |
| <i>Haemophilus haemolyticus</i> M21127.                                        | F9GUM5     |
| <i>Haemophilus influenzae</i> (strain 86-028NP).                               | Q4QLB6     |
| <i>Haemophilus influenzae</i> (strain ATCC 51907 / DSM 11121 / KW20 /Rd).      | P44121     |
| <i>Haemophilus influenzae</i> (strain NTHi 3655).                              | A0A0H3PM16 |
| <i>Haemophilus influenzae</i> F3031.                                           | E7A588     |
| <i>Helicobacter cinaedi</i> ATCC BAA-847.                                      | I7GTY9     |
| <i>Helicobacter jaachi</i> .                                                   | A0A4U8TCZ2 |
| <i>Helicobacter magdeburgensis</i> .                                           | A0A4U8SY23 |
| <i>Helicobacter</i> sp. MIT 11-5569.                                           | A0A4U8SFL6 |
| <i>Hydrogenovibrio thermophilus</i> .                                          | A0A410H4C7 |
| <i>Marinobacter salarius</i> .                                                 | A0A1W6K568 |
| <i>Marinobacterium aestuarii</i> .                                             | A0A1A9EW76 |
| <i>Muribacter muris</i> .                                                      | A0A4Y9K0J0 |
| <i>Neisseria animaloris</i> .                                                  | A0A1X3CN72 |
| <i>Neisseria cinerea</i> ATCC 14685.                                           | D0W4A0     |
| <i>Neisseria longate subsp. Glycolytica</i> ATCC 29315.                        | A0A0B5CFP4 |
| <i>Neisseria gonorrhoeae</i> (strain ATCC 700825 / FA 1090).                   | Q5F595     |
| <i>Neisseria gonorrhoeae</i> DGI2.                                             | D6HB39     |
| <i>Neisseria lactamica</i> (strain 020-06).                                    | E4ZAZ1     |
| <i>Neisseria lactamica</i> .                                                   | A0A1V0DRH7 |
| <i>Neisseria meningitidis</i> (strain alpha14).                                | C6S4M8     |
| <i>Neisseria meningitidis</i> alpha153.                                        | C6SEQ5     |
| <i>Neisseria meningitidis</i> M0579.                                           | A0A0G4BXU0 |
| <i>Neisseria meningitidis</i> serogroup B / serotype 15 (strain H44/76).       | E6MZN5     |
| <i>Neisseria meningitidis</i> serogroup B.                                     | A0A0H5QXB9 |
| <i>Neisseria meningitidis</i> serogroup C / serotype 2a (strain ATCC 700532 ). | A1KWC7     |
| <i>Neisseria mucosa</i> ATCC 25996.                                            | D2ZXK0     |
| <i>Neisseria sicca</i> ATCC 29256.                                             | C6M1S0     |
| <i>Neisseria zalophi</i> .                                                     | A0A5J6PWP0 |
| <i>Oceanisphaera arctica</i> .                                                 | A0A2P5TL84 |
| <i>Oceanisphaera psychrotolerans</i> .                                         | A0A1J4QHW1 |
| <i>Oleispira antarctica</i> .                                                  | A0A1Y5HF29 |
| <i>Pasteurella bettyae</i> CCUG 2042.                                          | I3DEQ0     |
| <i>Pasteurella testudinis</i> DSM 23072.                                       | A0A1W1V1D9 |
| <i>Psychromonas</i> sp. SP041.                                                 | A0A0A6YVN6 |
| <i>Rhodoferrax ferrireducens</i> .                                             | A0A1W9KTK4 |
| <i>Rodentibacter mrazii</i> .                                                  | A0A1V3IFV1 |
| <i>Rodentibacter pneumotropicus</i> .                                          | A0A1V3K0F6 |

---

|                                                       |            |
|-------------------------------------------------------|------------|
| <i>Rodentibacter rattii</i> .                         | A0A1V3L9A6 |
| <i>Shewanella amazonensis</i> (strain ATCC BAA-1098). | A1S744     |
| <i>Shewanella livingstonensis</i> .                   | A0A3G8LVU4 |
| <i>Shewanella polaris</i> .                           | A0A4Y5YFU0 |
| <i>Variovorax boronicumulans</i> .                    | A0A250DKK5 |
| <i>Vibrio aerogenes</i> .                             | A0A1M5Z756 |
| <i>Vibrio alginolyticus</i> .                         | A0A0L7YSC1 |
| <i>Vibrio cholerae</i> RC385.                         | D7H906     |
| <i>Vibrio fluvialis</i> .                             | A0A0X8LM10 |
| <i>Vibrio metoecus</i> .                              | A0A0Q0TQ58 |
| <i>Vibrio quintilis</i> .                             | A0A1M7YUC7 |

Supplementary table 1. UniProt Identifiers for ATP-dependent DNA ligases used to construct the phylogenetic tree in Figure 2

| <b>Organism</b>                           | <b>ATP-dependent DNA ligase NCBI identifier</b> |
|-------------------------------------------|-------------------------------------------------|
| <i>Burkholderia pseudomallei</i> .        | WP_050042554.1                                  |
| <i>Burkholderia ubonensis</i> .           | WP_059926806.1                                  |
| <i>Burkholderia diffusa</i> .             | WP_059466471.1                                  |
| <i>Burkholderia cenocepacia</i> .         | WP_077056196.1                                  |
| <i>Burkholderia sp. AU17325</i> .         | WP_089452168.1                                  |
| <i>Burkholderia territorii</i> .          | KWH13560.1                                      |
| <i>Burkholderia cepacia</i> .             | WP_060050868.1                                  |
| <i>Burkholderia lata</i> .                | WP_069252215.1                                  |
| <i>Burkholderia vietnamiensis</i> .       | WP_059895115.1                                  |
| <i>Burkholderia thailandensis</i> .       | WP_156530277.1                                  |
| <i>Ralstonia solanacearum</i> .           | WP_052485970.1                                  |
| <i>Ralstonia solanacearum</i> FJAT-1458.  | APF87578.1                                      |
| <i>Pseudomonas</i> phage JG054.           | ARB11192.1                                      |
| <i>Stenotrophomonas</i> phage DLP4.       | ATS92210.1                                      |
| <i>Pseudomonas</i> phage PaMx25.          | YP_009603603.1                                  |
| <i>Pseudomonas</i> phage JG012.           | ARB11117.1                                      |
| <i>Pseudomonas</i> phage NP1.             | YP_009285862.1                                  |
| <i>Ralstonia</i> phage RSJ2.              | YP_009216555.1                                  |
| <i>Xanthomonas</i> phage Xoo-sp2.         | ANT45243.1                                      |
| <i>Pararhodospirillum photometricum</i> . | WP_014415654.1                                  |
| MULTISPECIES: <i>Neisseria</i> .          | WP_097784573.1                                  |
| <i>Xanthomonas campestris</i> .           | WP_155400850.1                                  |
| <i>Verrucomicrobiales bacterium</i> .     | HBJ83482.1                                      |
| <i>Desulfurellales bacterium</i> .        | TXH47257.1                                      |
| <i>Aeromonas sobria</i> .                 | WP_148612331.1                                  |
| <i>Synechococcus</i> phage S-CRM01.       | YP_004508627.1                                  |
| <i>Pseudoalteromonas</i> phage PH1.       | YP_009321550.1                                  |
| <i>Synechococcus sp.</i> WH 8016.         | WP_006852967.1                                  |

Supplementary table 2. Identifiers for ATP-dependent DNA ligases used to construct the phylogenetic tree in Figure 5.

| <b>Organism</b>                                          | <b>Name</b>                                                                                   | <b>Direction</b>                      | <b>locus_tag</b>          | <b>protein_id</b>        |            |
|----------------------------------------------------------|-----------------------------------------------------------------------------------------------|---------------------------------------|---------------------------|--------------------------|------------|
| <i>V. cholera</i>                                        | methyl-accepting chemotaxis protein                                                           | forward                               | MS6_1320                  | BAP02975.1               |            |
|                                                          | cell wall-associated hydrolase                                                                | reverse                               | MS6_1321                  | BAP02976.1               |            |
|                                                          | type IIA topoisomerase, B subunit                                                             | forward                               | MS6_1322                  | BAP02977.1               |            |
|                                                          | ribulosamine/erythrulosamine 3-kinase<br>potentially involved in protein<br>deglycation       | reverse                               | MS6_1323                  | BAP02978.1               |            |
|                                                          | hypothetical protein                                                                          | reverse                               | MS6_1324                  | BAP02979.1               |            |
|                                                          | multidrug and toxin extrusion MATE<br>family effluxpump YdhE/NorM                             | reverse                               | MS6_1325                  | BAP02980.1               |            |
|                                                          | hypothetical protein                                                                          | reverse                               | MS6_1326                  | BAP02981.1               |            |
|                                                          | <b><u>DNA ligase</u></b>                                                                      | <b><u>forward</u></b>                 | <b><u>MS6_1327</u></b>    | <b><u>BAP02982.1</u></b> |            |
|                                                          | TPR domain protein, putative component<br>of TonB system                                      | forward                               | MS6_1328                  | BAP02983.1               |            |
|                                                          | ferric siderophore transport system,<br>periplasmic binding protein TonB                      | forward                               | MS6_1329                  | BAP02984.1               |            |
|                                                          | biopolymer transport protein ExbD/TolR                                                        | forward                               | MS6_1330                  | BAP02985.1               |            |
|                                                          | ferric siderophore transport system,<br>biopolymer transport protein ExbB                     | forward                               | MS6_1331                  | BAP02986.1               |            |
|                                                          | MotA/TolQ/ExbB proton channel family<br>protein                                               | forward                               | MS6_1332                  | BAP02987.1               |            |
|                                                          | TonB system biopolymer transport<br>component                                                 | forward                               | MS6_1333                  | BAP02988.1               |            |
|                                                          | glycerol-3-phosphate ABC transporter,<br>periplasmic glycerol-3-phosphate-<br>binding protein | reverse                               | MS6_1334                  | BAP02989.1               |            |
|                                                          | glycerol-3-phosphate ABC transporter,<br>permease protein UgpA                                | reverse                               | MS6_1335                  | BAP02990.1               |            |
|                                                          | <i>N. meningitides</i>                                                                        | phosphomethylpyrimidine synthase ThiC | forward                   | CCD84_11490              | QEN75775.1 |
|                                                          |                                                                                               | tRNA-Met                              | reverse                   | CCD84_11485              |            |
|                                                          |                                                                                               | hypothetical protein                  | reverse                   | CCD84_11480              |            |
|                                                          |                                                                                               | NUDIX hydrolase                       | reverse                   | CCD84_11475              | QEN75774.1 |
| ABC transporter ATP-binding protein                      |                                                                                               | reverse                               | CCD84_11470               | QEN75773.1               |            |
| hypothetical protein                                     |                                                                                               | reverse                               | CCD84_11465               | QEN75772.1               |            |
| phosphoenolpyruvate—protein<br>phosphotransferase        |                                                                                               | forward                               | CCD84_11460               | QEN75771.1               |            |
| phosphocarrier protein HPr                               |                                                                                               | forward                               | CCD84_11455               | QEN75770.1               |            |
| PTS mannose transporter subunit IIA                      |                                                                                               | forward                               | CCD84_11450               | QEN75769.1               |            |
| hypoxanthine-guanine<br>phosphoribosyltransferase        |                                                                                               | forward                               | CCD84_11445               | QEN75768.1               |            |
| <b><u>ATP-dependent DNA ligase</u></b>                   |                                                                                               | <b><u>forward</u></b>                 | <b><u>CCD84_11440</u></b> | <b><u>QEN75767.1</u></b> |            |
| MBL fold hydrolase                                       |                                                                                               | reverse                               | CCD84_11435               | QEN75766.1               |            |
| DNA recombination protein RmuC                           |                                                                                               | forward                               | CCD84_11430               | QEN75765.1               |            |
| cytochrome c1                                            |                                                                                               | forward                               | CCD84_11425               | QEN75764.1               |            |
| cytochrome b                                             |                                                                                               | forward                               | CCD84_11420               | QEN75763.1               |            |
| ubiquinol-cytochrome c reductase iron-<br>sulfur subunit |                                                                                               | forward                               | CCD84_11415               | QEN75762.1               |            |

|                      |                                                    |                       |                          |                          |
|----------------------|----------------------------------------------------|-----------------------|--------------------------|--------------------------|
|                      | Nif3-like dinuclear metal center hexameric protein | forward               | CCD84_11410              | QEN75761.1               |
| <i>H. influenzae</i> | branched-chain amino acid aminotransferase         | reverse               | NF38_08205               | AIT68164.1               |
|                      | uvrD                                               | reverse               | NF38_08210               | AIT68362.1               |
|                      | peptide ABC transporter permease                   | reverse               | NF38_08215               | AIT68165.1               |
|                      | peptide transporter                                | reverse               | NF38_08220               | AIT68166.1               |
|                      | dppD                                               | reverse               | NF38_08225               | AIT68167.1               |
|                      | dppF                                               | reverse               | NF38_08230               | AIT68168.1               |
|                      | <b><u>DNA ligase</u></b>                           | <b><u>forward</u></b> | <b><u>NF38_08235</u></b> | <b><u>AIT68169.1</u></b> |
|                      | gmhA                                               | reverse               | NF38_08240               | AIT68170.1               |
|                      | arginine ABC transporter ATP-binding protein       | reverse               | NF38_08245               | AIT68171.1               |
|                      | arginine ABC transporter substrate-binding protein | reverse               | NF38_08250               | AIT68172.1               |
|                      | ABC transporter                                    | reverse               | NF38_08255               | AIT68173.1               |
|                      | artM                                               | reverse               | NF38_08260               | AIT68174.1               |
|                      | hypothetical protein                               | reverse               | NF38_08265               | AIT68363.1               |
|                      | protein opa                                        | forward               | NF38_08270               | AIT68175.1               |
|                      | sprT                                               | forward               | NF38_08275               | AIT68176.1               |
|                      | S-adenosylmethionine synthetase                    | forward               | NF38_08280               | AIT68177.1               |
| <i>C. jejuni</i>     | putative integral membrane protein                 | reverse               | Cj1660                   | CAL35756.1               |
|                      | possible ABC transport system permease             | reverse               | Cj1661                   | CAL35757.1               |
|                      | putative integral membrane protein                 | reverse               | Cj1662                   | CAL35758.1               |
|                      | putative ABC transport system ATP-binding protein  | reverse               | Cj1663                   | CAL35759.1               |
|                      | putative periplasmic thioredoxin                   | reverse               | Cj1664                   | CAL35760.1               |
|                      | putative lipoprotein thioredoxin                   | reverse               | Cj1665                   | CAL35761.1               |
|                      | putative periplasmic protein                       | forward               | Cj1666c                  | CAL35762.1               |
|                      | RepA protein homolog                               | forward               | Cj1667c                  | CAL35763.1               |
|                      | putative periplasmic protein                       | forward               | Cj1668c                  | CAL35764.1               |
|                      | <b><u>putative ATP-dependent DNA ligase</u></b>    | <b><u>forward</u></b> | <b><u>Cj1669c</u></b>    | <b><u>CAL35765.1</u></b> |
|                      | cgpA                                               | forward               | Cj1670c                  | CAL35766.1               |
|                      | hypothetical protein Cj1671c                       | forward               | Cj1671c                  | CAL35767.1               |
|                      | eno                                                | forward               | Cj1672c                  | CAL35768.1               |
|                      | recA                                               | forward               | Cj1673c                  | CAL35769.1               |
|                      | conserved hypothetical protein Cj1674              | reverse               | Cj1674                   | CAL35770.1               |
|                      | fliQ                                               | reverse               | Cj1675                   | CAL35771.1               |
|                      | murB                                               | reverse               | Cj1676                   | CAL35772.1               |
|                      | putative lipoprotein                               | reverse               | Cj1677                   | CAL35773.1               |

Supplementary table 3. Genes for region surrounding Lig E from pathogen genomes used in analysis

| <b>Oligo name</b> | <b>Sequence 5'-3'</b>                    | <b>Modifications</b> |
|-------------------|------------------------------------------|----------------------|
| Oligo_1 (Nick)    | AGGCCATGGCTGATATCGCA                     | 5' 6-FAM             |
| Oligo_2           | TAGGCATTCGAGCTCCGTCG                     | 5' Phosphate         |
| Oligo_3(nick)     | CGACGGAGCTCGAATGCCTATGCGATATCAGCCATGGCCT |                      |
| Oligo_4 (OH)      | ATATCAGCCATGGCCT                         | 5' Phosphate         |
| Oligo_5 (OH)      | CGACGGAGCTCGAATGCCTATGCG                 |                      |
| Oligo_6 mis       | CGACGGAGCTCGAATGCCTACGCGATATCAGCCATGGCCT |                      |

|         |                                           |              |
|---------|-------------------------------------------|--------------|
| Oligo_7 | TGCGATATCAGCCATGGCCT                      |              |
| Oligo_8 | CGACGGAGCTCGAATGCCTA                      | 5' Phosphate |
| Oligo_9 | CGACGGAGCTCGAATGCCTAGTGCGATATCAGCCATGGCCT |              |

*Supplementary table 4. DNA oligomers used to assemble assay substrates*

| <b>Substrate</b> | <b>Oligo combination</b> |
|------------------|--------------------------|
| Nick             | Oligo_1 + 2 + 3          |
| Cohesive         | Oligo_1 + 2 + 4 + 5      |
| Mismatch         | Oligo_1 + 2 + 6          |
| Blunt            | Oligo_1 + 2 + 7          |
| Gapped           | Oligo_1 + 2 + 9          |

*Supplementary table 5. Combinations of DNA oligos used to assemble assay substrates*

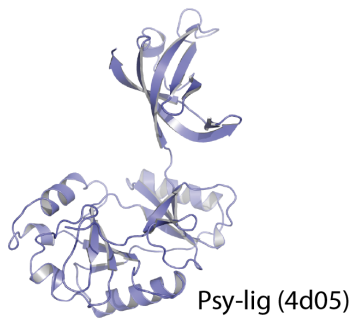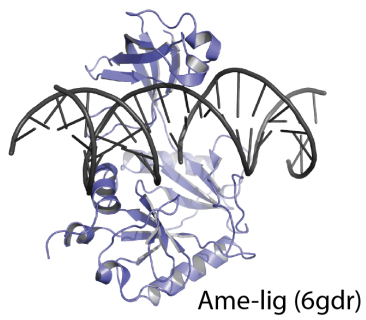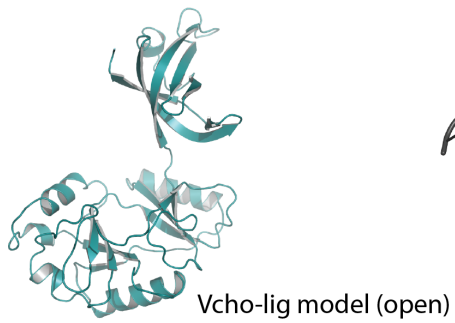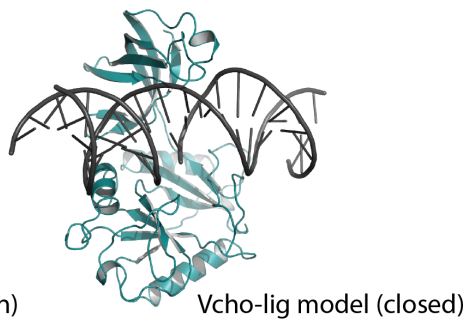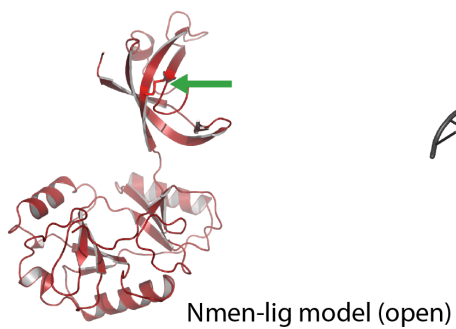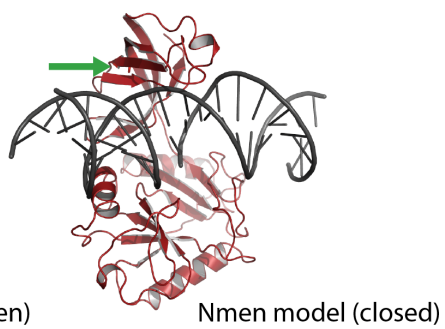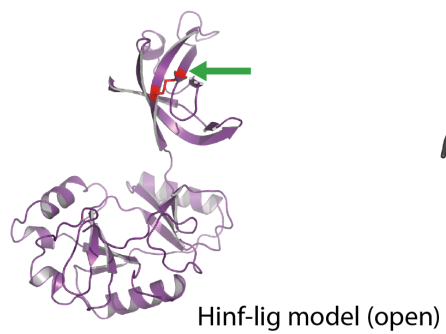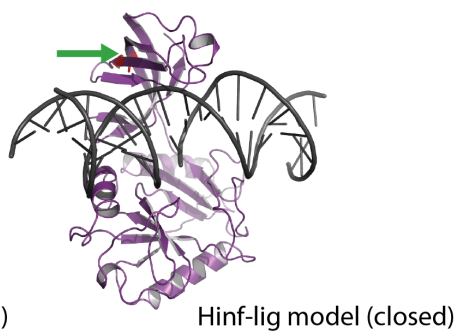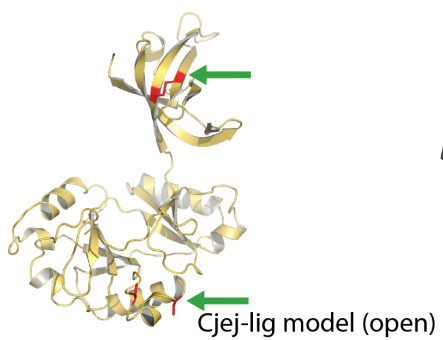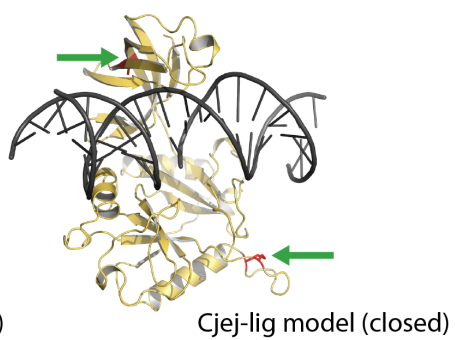

Supplementary figure 1. Homology models of Lig E from various pathogens in both the DNA-free (open) and DNA-bound (closed) conformations. Cysteine residues are colored red and their positions indicated with green arrows.

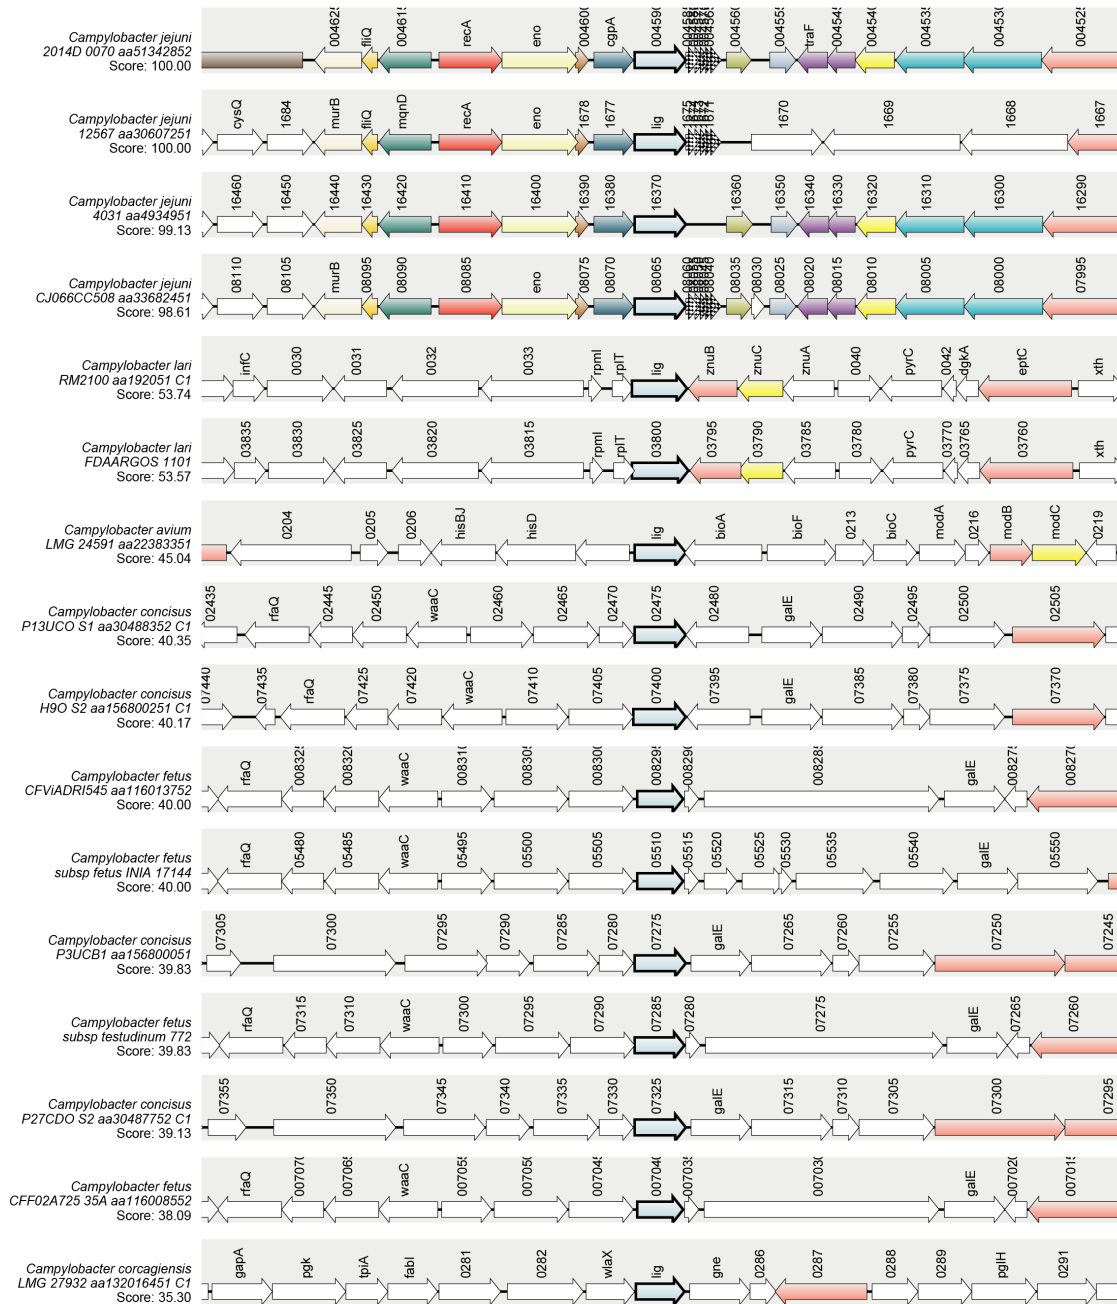

Supplementary figure 2. Synteny analysis of the Lig E region of *Campylobacter* genomes



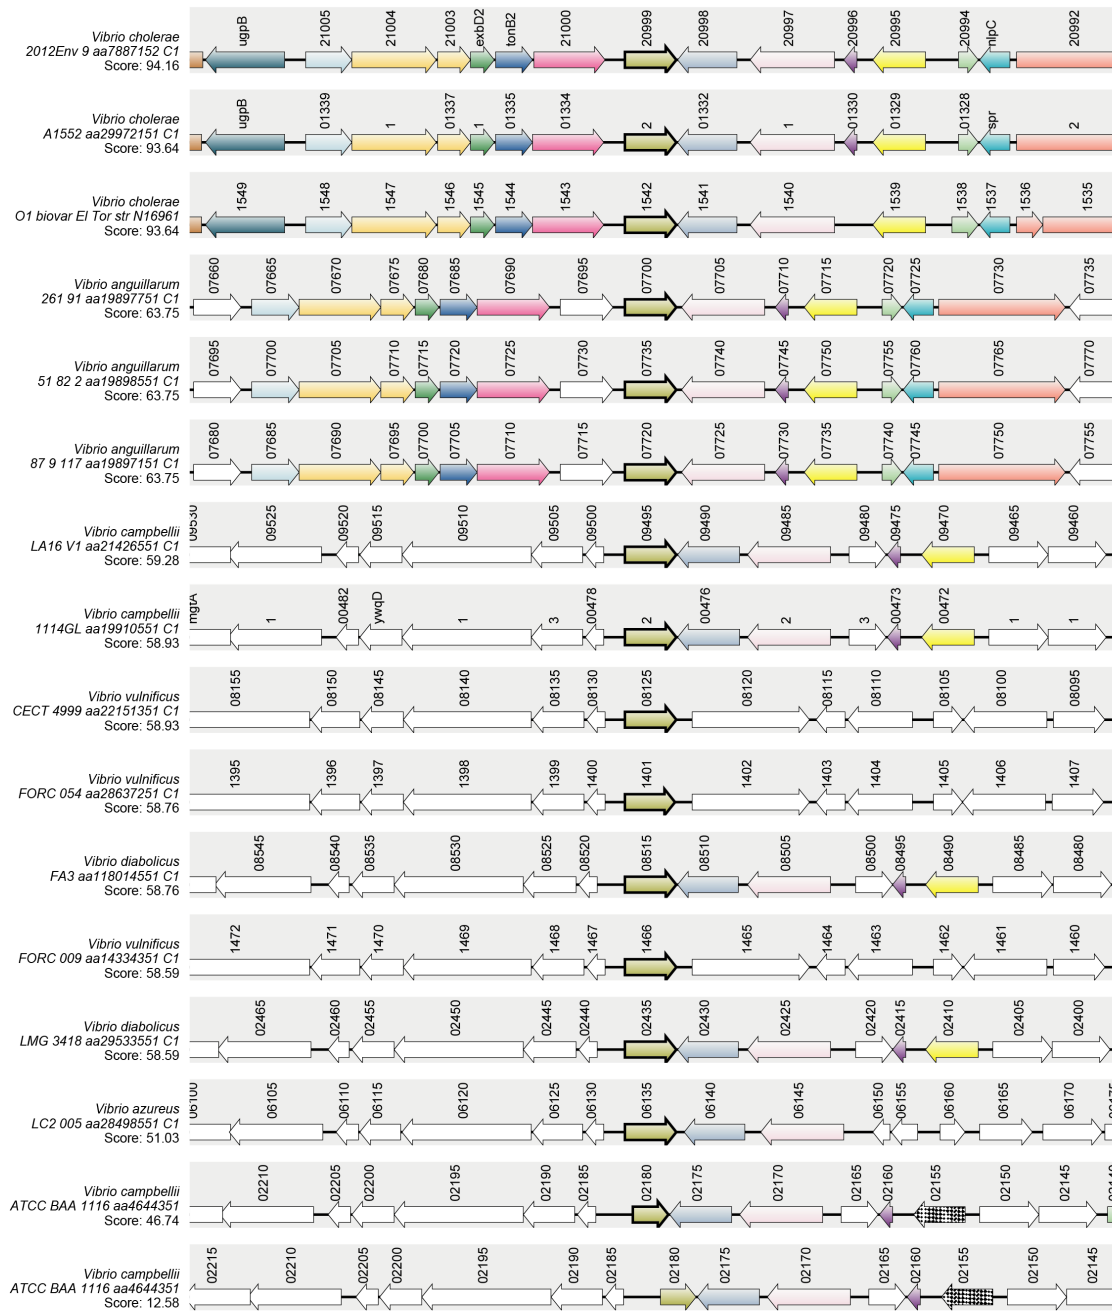

Supplementary figure 3. Syntenic analysis of the LigE region of *Vibrio* genomes

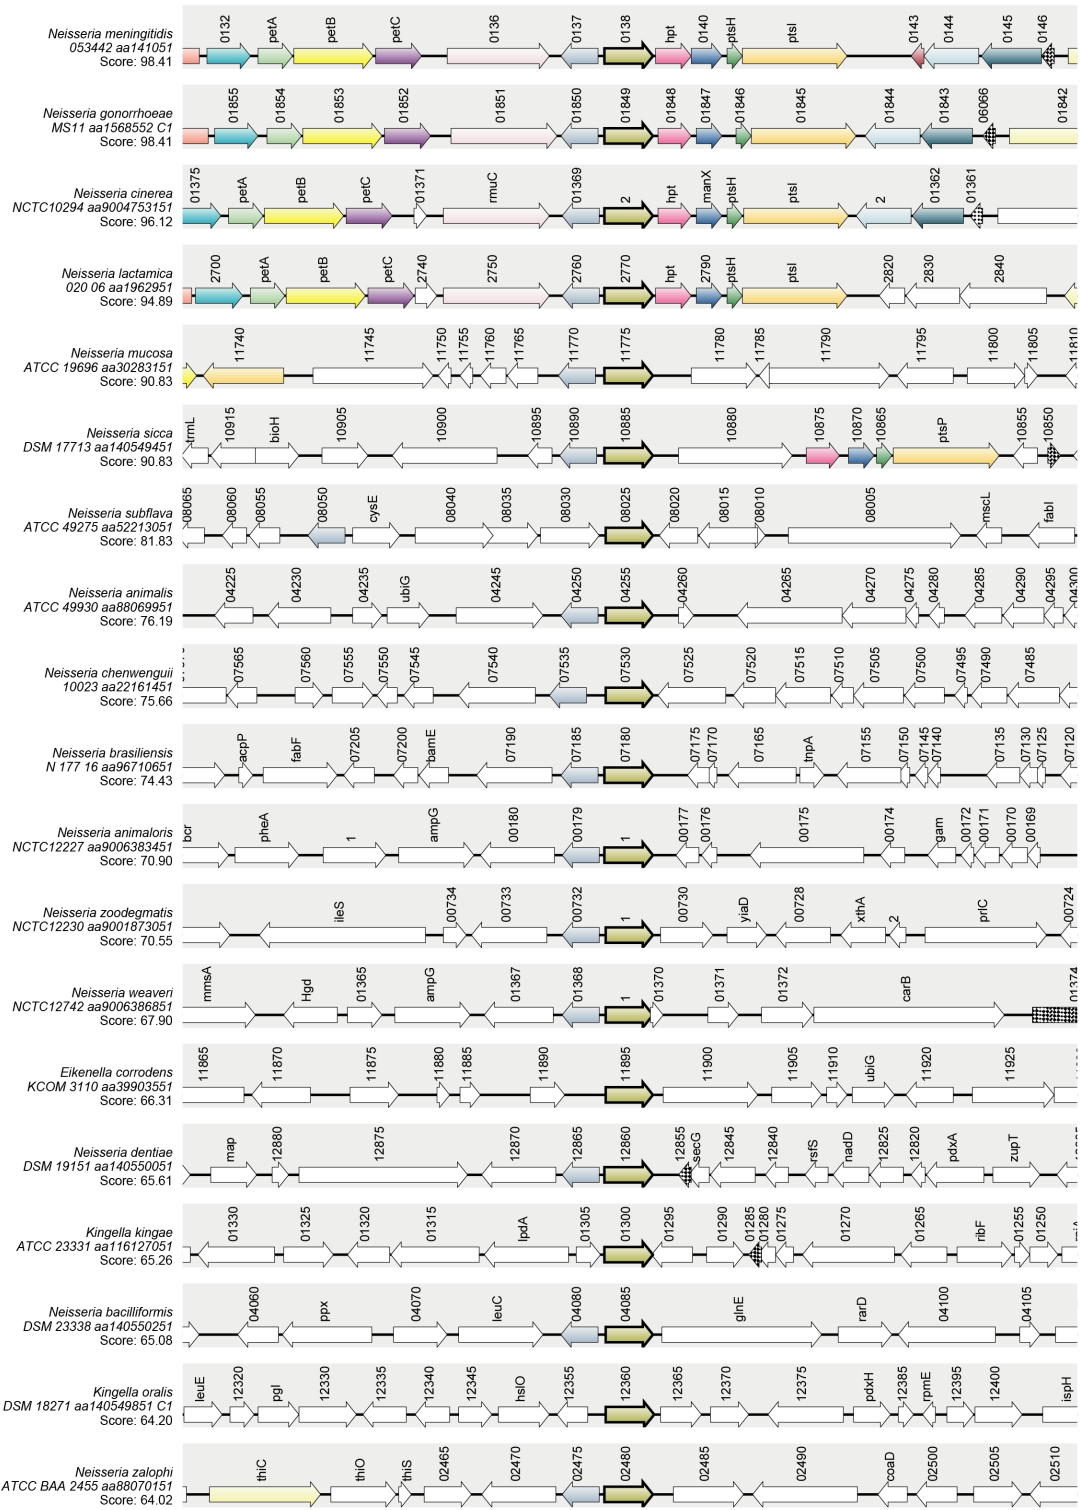

Supplementary figure 4. Synteny analysis of the Lig E region of *Neisseria* genomes

## Genomic contexts

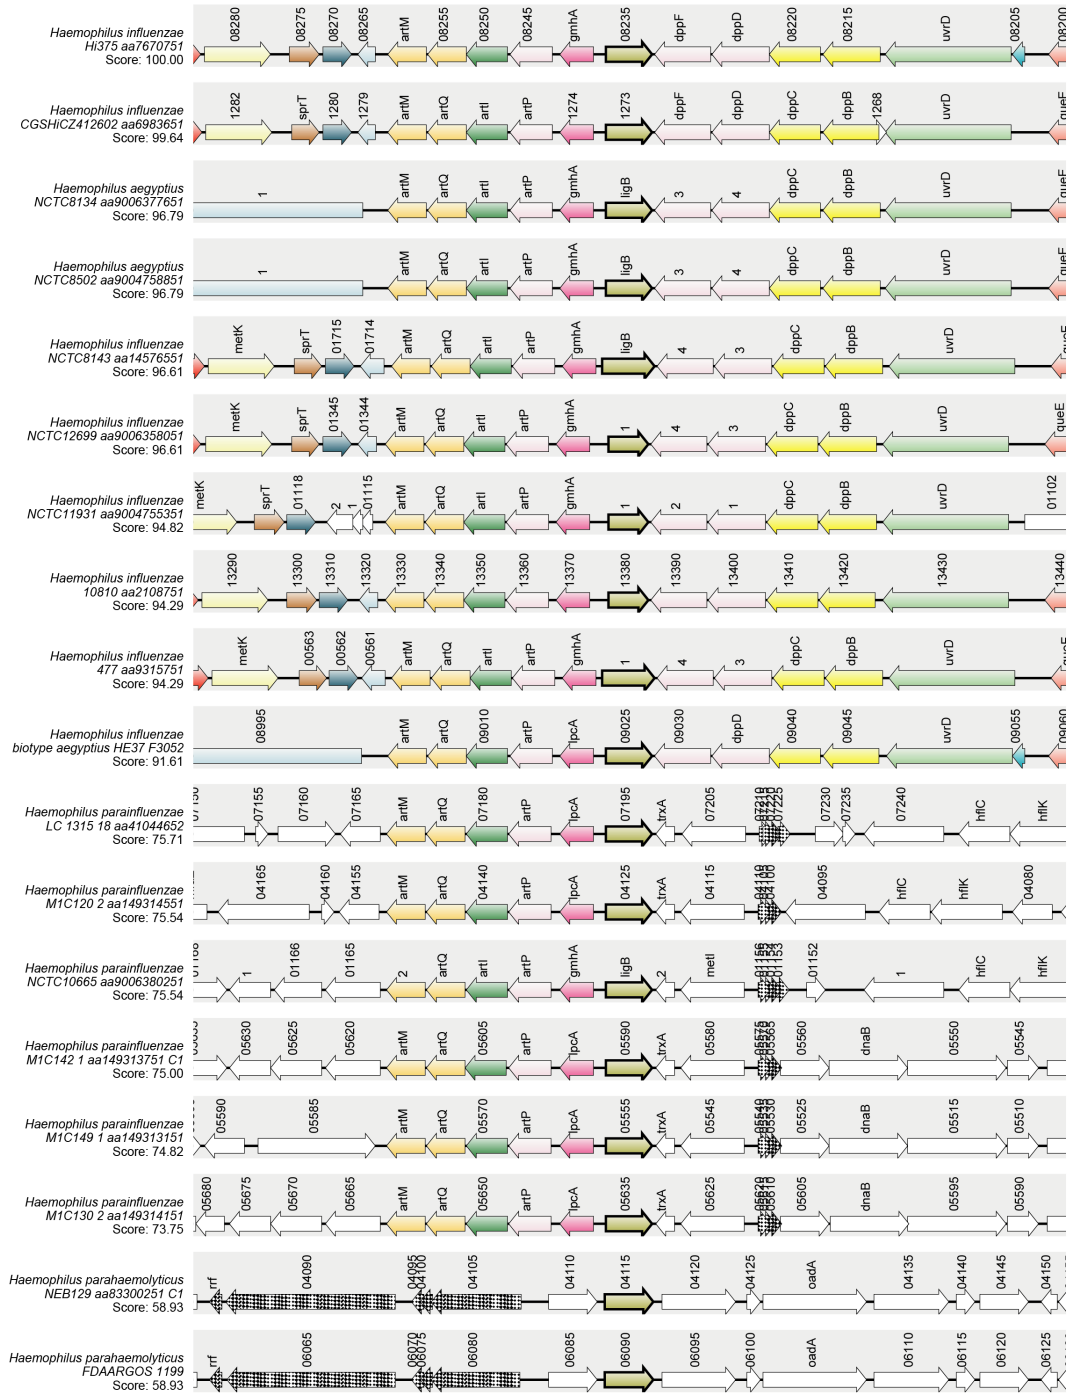

Supplementary figure 5. Synteny analysis of the Lig E region of Haemophilus genomes

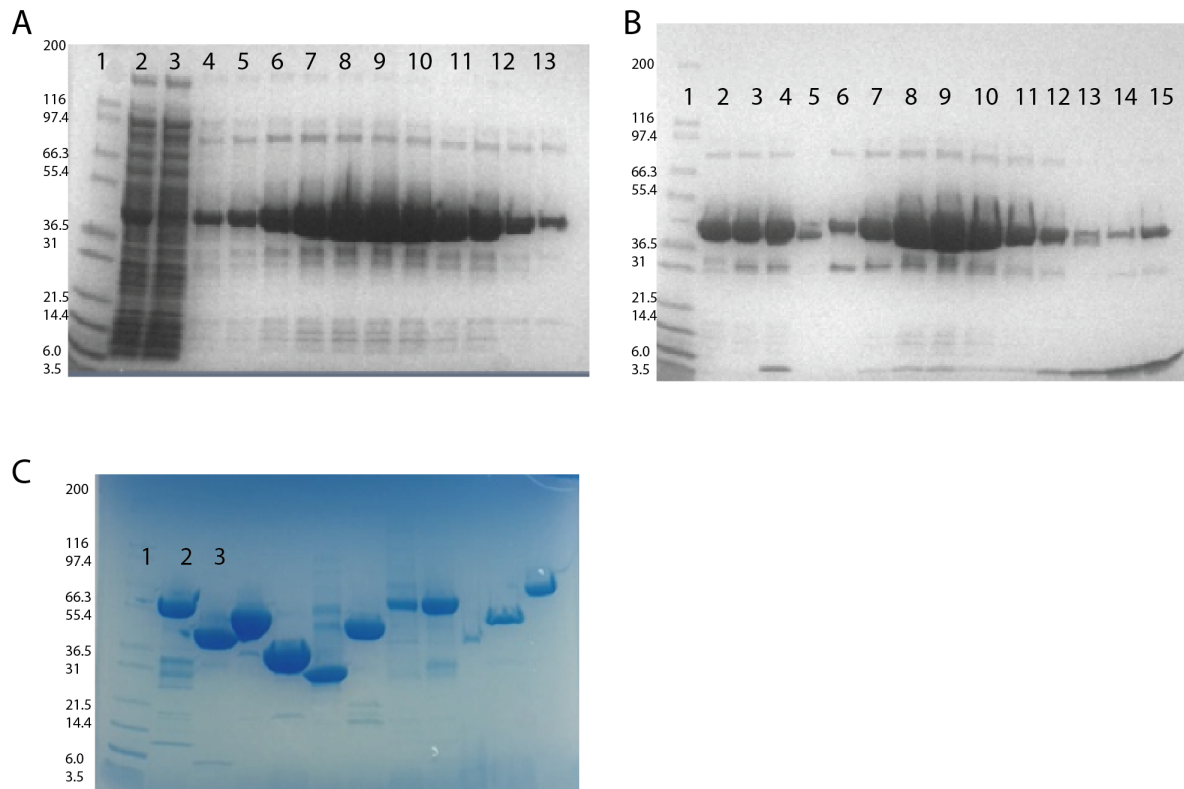

Supplementary figure 6. SDS-PAGE gels of Bsp-lig purification lane 1 is protein standard Mark12 for all gels. A) First IMAC showing crude soluble (lane 1) flow-through (lane 2) and elution fractions between 300-400 mM imidazole (lanes 4-13). B) TEV cleavage and second (reverse) IMAC showing pooled fractions from the desalt step (lane 2) pooled fractions + TEV at time =0 (lane 3) and after overnight incubation (lane 4), pooled flow through fractions from the reverse IMAC (lane 5) and elution fractions of the reverse IMAC (i.e. uncleaved Bsp-lig, TEV and TEV). C) Pooled and up-concentrated Bsp-lig after gel filtration (lane 3). Lane 2 and lanes on the right of the image (un-labeled) are unrelated protein samples from another project.

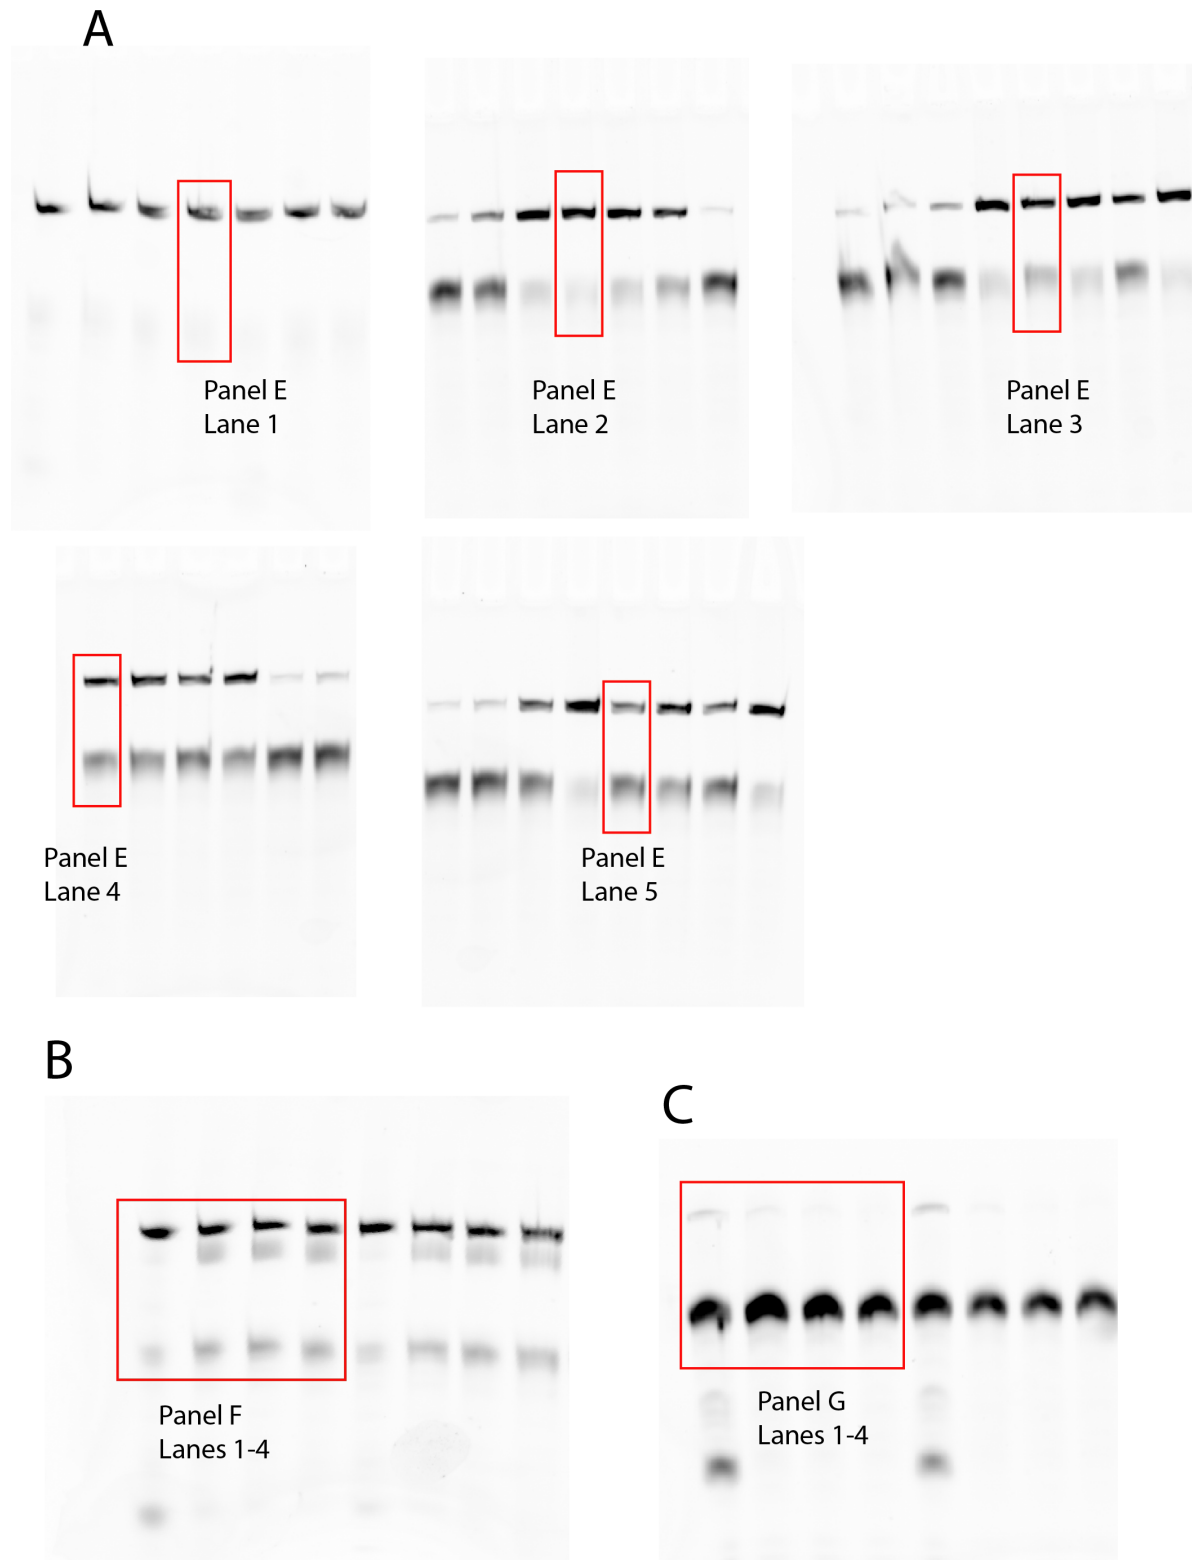

*Supplementary figure 7. Uncropped gels from figure 3. A) Bsp-lig activity with nicked substrate (Figure 3 panel E). These samples were run non-sequentially across multiple gels interspersed with samples from another project; lanes containing Bsp-lig are shown in red boxes. B) Bsp-lig activity with cohesive-end substrate (Figure 3 panel F). Region used in the crop is indicated with a red box. Samples to the right are duplicates. C) Bsp-lig activity with mismatch substrate (Figure 3 panel G). Region used in the crop is indicated with a red box. Samples to the right are duplicates. In both B and C the lower molecular weight band is indicative of trace nuclease contamination with higher protein concentrations.*

A

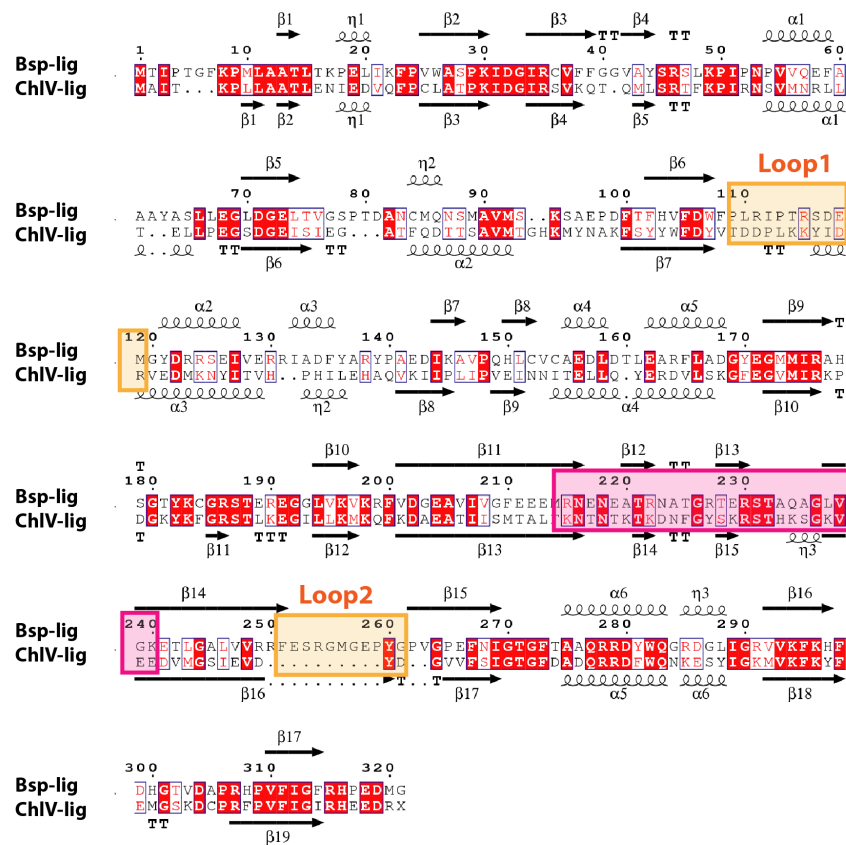

B

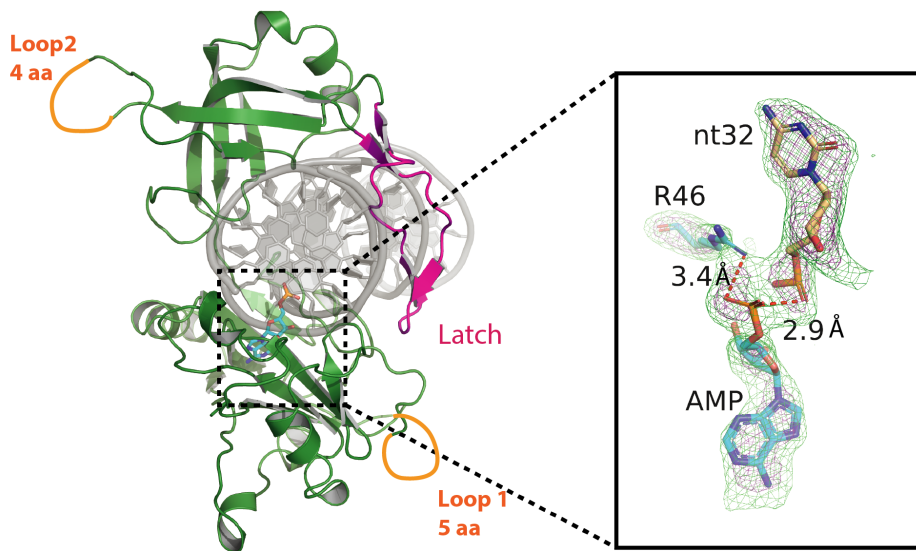

Supplementary figure 8. A) Sequence alignment of Bsp-lig and ChIV-lig showing secondary structure alignments from the current Bsp-lig structure (7obn) and ChIV-lig (2q2t) above and below respectively. Loop regions of Bsp-lig are highlighted in yellow, latch region in magenta. B) Bsp-lig structure highlighting loop and latch regions. Inset shows the polder omit map of the spent Amp cofactor in the active site interacting with nt32 from the DNA substrate nick, and Arg46 in the Bsp-lig active site. Measured distances between atoms are indicated with dashed red lines.
